# Supplementary material for: Solid-state NMR of unlabeled plant cell walls: high-resolution structural analysis without isotopic enrichment
Source: PubMed Central journal article supplement (PMC7792314; doi:10.1186/s13068-020-01858-x), 2021-01-07
Supplement: 13068_2020_1858_MOESM1_ESM.pdf [file 13068_2020_1858_MOESM1_ESM.pdf]

## Supplementary Information

### **Solid-State NMR of Unlabeled Plant Cell Walls: High-Resolution Structural Analysis Without Isotopic Enrichment**

Wancheng Zhao<sup>1</sup>, Alex Kirui<sup>1</sup>, Fabien Deligey<sup>1</sup>, Frederic Mentink-Vigier<sup>2</sup>, Yihua Zhou<sup>3</sup>, Baocai Zhang<sup>3</sup>, Tuo Wang<sup>1\*</sup>

Correspondence: tuowang@lsu.edu

<sup>1</sup> Department of Chemistry, Louisiana State University, Baton Rouge, LA 70803, USA

<sup>2</sup> National High Magnetic Field Laboratory, Tallahassee, FL 32310, USA

<sup>3</sup> State Key Laboratory of Plant Genomics, Institute of Genetics and Developmental Biology, Chinese Academy of Sciences, Beijing 100101, China

**Table S1. Fit parameters of  $^{13}\text{C}$  CP spectrum of wild-type (WT) sample.** The peaks are classified in three groups according to their influence on the C4 region, as by integrating, interior and surface cellulose contribution is shown to respectively be 40.5% and 59.5% of the cellulose content.

| $\delta$ [ppm]                    | Assignment | Amplitude | Width [ppm] | Integral [%] |
|-----------------------------------|------------|-----------|-------------|--------------|
| Cellulose C4                      |            |           |             |              |
| 90.0                              |            | 0.4       | 0.8         | 0.1          |
| 89.0                              | i4         | 6.2       | 1.2         | 3.3          |
| 88.0                              |            | 1.7       | 1.2         | 0.9          |
| 87.3                              |            | 1.0       | 1.0         | 0.4          |
| 84.3                              | s4         | 6.8       | 1.6         | 4.7          |
| 83.1                              |            | 4.1       | 1.2         | 2.2          |
| Other peaks close to cellulose C4 |            |           |             |              |
| 81.9                              |            | 2.7       | 1.8         | 2.1          |
| 80.5                              |            | 1.3       | 1.8         | 1.0          |
| 76.1                              |            | 13.4      | 2.6         | 10.3         |
| Other peaks far from cellulose C4 |            |           |             |              |
| 105.8                             |            | 13.4      | 1.1         | 6.4          |
| 104.9                             |            | 11.9      | 1.1         | 5.7          |
| 103.9                             |            | 10.3      | 1.2         | 5.4          |
| 74.9                              |            | 20.8      | 1.2         | 7.5          |
| 74.0                              |            | 17.0      | 1.0         | 4.8          |
| 72.1                              |            | 40.4      | 2.3         | 27.4         |
| 71.3                              |            | 3.9       | 0.4         | 0.4          |
| 64.9                              |            | 11.0      | 1.6         | 5.2          |
| 64.4                              |            | 7.0       | 0.7         | 1.5          |
| 63.1                              |            | 6.5       | 1.4         | 2.8          |
| 61.9                              |            | 9.5       | 1.7         | 4.9          |
| 59.6                              |            | 3.1       | 2.4         | 3.1          |

**Table S2. Fit parameters of  $^{13}\text{C}$  CP spectrum of *ctl1 ctl2* double mutant.** The peaks are classified in three groups according to their influence on C4 region, as by integrating, interior and surface cellulose contribution is shown to respectively be 44.6% and 55.4% of the cellulose content.

| $\delta$ [ppm]                    | Assignment | Amplitude | Width [ppm] | Integral [%] |
|-----------------------------------|------------|-----------|-------------|--------------|
| Cellulose C4                      |            |           |             |              |
| 90.0                              | i4         | 1.2       | 0.8         | 0.4          |
| 89.0                              |            | 6.2       | 1.0         | 2.5          |
| 88.0                              |            | 1.8       | 1.2         | 0.9          |
| 87.4                              | s4         | 0.9       | 1.0         | 0.3          |
| 84.3                              |            | 4.9       | 1.5         | 2.9          |
| 83.5                              |            | 0.7       | 0.8         | 0.2          |
| 83.0                              |            | 3.4       | 1.5         | 1.9          |
| Other peaks close to cellulose C4 |            |           |             |              |
| 81.9                              |            | 3.2       | 1.8         | 2.3          |
| 81.0                              |            | 1.3       | 1.0         | 0.5          |
| 80.0                              |            | 1.5       | 1.4         | 0.8          |
| 76.1                              |            | 13.4      | 2.6         | 11.3         |
| Other peaks far from cellulose C4 |            |           |             |              |
| 105.8                             |            | 9.5       | 0.8         | 3.2          |
| 104.9                             |            | 13.0      | 1.5         | 7.3          |
| 103.8                             |            | 10.3      | 1.3         | 5.3          |
| 100.8                             |            | 1.5       | 4.4         | 2.4          |
| 74.9                              |            | 23.8      | 1.2         | 7.7          |
| 74.0                              |            | 19.0      | 1.0         | 4.9          |
| 72.1                              |            | 39.1      | 2.3         | 23.9         |
| 71.3                              |            | 7.1       | 0.5         | 1.0          |
| 70.5                              |            | 6.0       | 0.7         | 1.1          |
| 64.9                              |            | 13.1      | 1.7         | 5.9          |
| 64.4                              |            | 3.3       | 1.0         | 0.9          |
| 63.2                              |            | 8.3       | 1.6         | 3.5          |
| 61.9                              |            | 6.9       | 1.7         | 3.2          |
| 59.6                              |            | 4.3       | 3.5         | 5.6          |

**Table S3. Peak numbers of INADEQUATE spectra shown in Fig. 4.**

|                  | interior<br>cellulose (i) | surface<br>cellulose (s) | xylose in<br>xylan (Xn) | xylose in<br>xyloglucan (x) | arabinose<br>(A) |
|------------------|---------------------------|--------------------------|-------------------------|-----------------------------|------------------|
| WT               | 18                        | 16                       | 6                       | 6                           | 0                |
| <i>ctl1 ctl2</i> | 16                        | 15                       | 18                      | 2                           | 10               |

**Table S4. <sup>13</sup>C-T<sub>1</sub> and <sup>1</sup>H-T<sub>1ρ</sub> relaxation times of cellulose and xylan in WT and *ctl1 ctl2* samples.** The data is fit using single exponential equation  $I(t) = e^{-t/T}$ , where T could be T<sub>1</sub> or T<sub>1ρ</sub>. Error bars are standard deviations of the fitting parameters. CS: <sup>13</sup>C chemical shift. Unidentified (-).

| Assignments            | Rice WT     |                            |             |                         | Rice <i>ctl1 ctl2</i> double mutant |                            |             |                         |
|------------------------|-------------|----------------------------|-------------|-------------------------|-------------------------------------|----------------------------|-------------|-------------------------|
|                        | CS<br>(ppm) | T <sub>1</sub> (CP)<br>(s) | CS<br>(ppm) | T <sub>1ρ</sub><br>(ms) | CS<br>(ppm)                         | T <sub>1</sub> (CP)<br>(s) | CS<br>(ppm) | T <sub>1ρ</sub><br>(ms) |
| i/s/Xn <sup>2f</sup> 1 | 105.6       | 25±1                       | 105.5       | 43±2                    | 105.5                               | 11.3±0.8                   | 105.3       | 31±2                    |
| i4                     | 89.3        | 35±5                       | 89.3        | 53±2                    | 89.3                                | 21±2                       | 89.1        | 42±2                    |
| s4                     | 84.2        | 20±1                       | 84.1        | 33±2                    | 84.1                                | 9.3±0.6                    | 84.0        | 29±3                    |
| i6                     | 65          | 13±1                       | 64.7        | 28±3                    | 65.2                                | 7.4±0.8                    | 65          | 24±2                    |
| s6                     | 62.9        | 4.2±0.5                    | 62.8        | 24±2                    | 63.1                                | 2.3±0.4                    | 62.8        | 18±2                    |
| Xn-Ac <sup>CO</sup>    | 173.7       | -                          | 173.7       | 11±1                    | 174.3                               | 8.3±0.7                    | 174.3       | -                       |
| Xn1 <sup>3f</sup>      | 102.0       | 7.7±0.4                    | 102.5       | 7.9±0.8                 | 102.7                               | 4.8±0.4                    | 101.8       | 8±1                     |
| Xn4 <sup>2f</sup>      | 82.2        | 10.5±0.9                   | 82.2        | 18±2                    | 82.2                                | 7.5±0.6                    | 82.2        | 18±2                    |
| Xn4 <sup>3f</sup>      | 77.7        | 10±2                       | 78.0        | 16±2                    | 77.5                                | 6.9±0.5                    | 78.0        | 10±1                    |
| Xn-Ac <sup>Me</sup>    | 21.6        | 7.8±0.7                    | 21.7        | 10±2                    | 21.7                                | 4.6±0.3                    | 21.7        | 9±1                     |

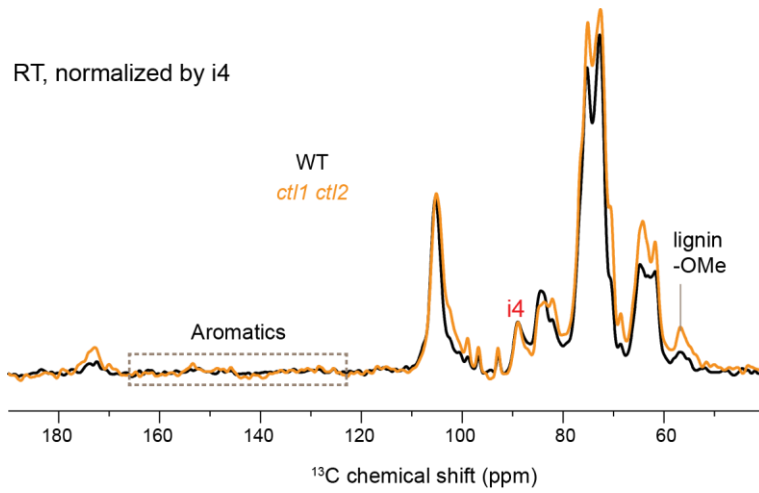

**Figure S1. Lignin has increased methyl ether substitution in the double mutant.** The spectra of wild-type (black) and *ct11 ct12* double mutant (yellow) are normalized by the interior cellulose carbon 4 (i4) peak. The lignin methyl ethers (lignin -OMe) has a doubled intensity in *ct11 ct12* but the lignin aromatics have a comparable intensity in both samples.

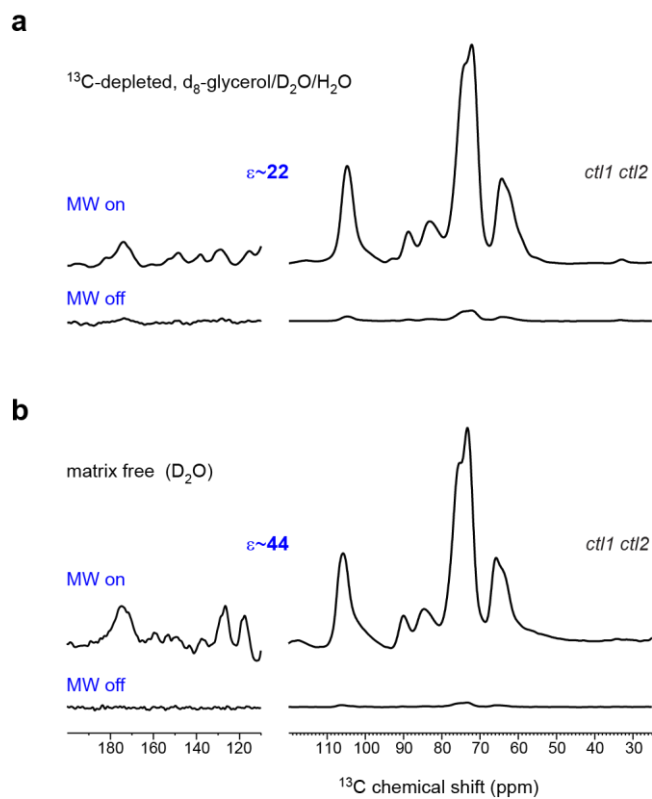

**Figure S2. Additional dataset of samples prepared using different protocols.** **a**, *ctl1 ctl2* sample in the solvent of <sup>13</sup>C-depleted, d<sub>8</sub>-glycerol/D<sub>2</sub>O/H<sub>2</sub>O (60/30/10 vol%) has shown a 22-fold enhancement of sensitivity. **b**, the *ctl1 ctl2* sample prepared using the matrix-free protocol (with only a few μL of D<sub>2</sub>O) shows an enhancement factor of 44. The detailed experimental parameters have been listed in **Table 2**.

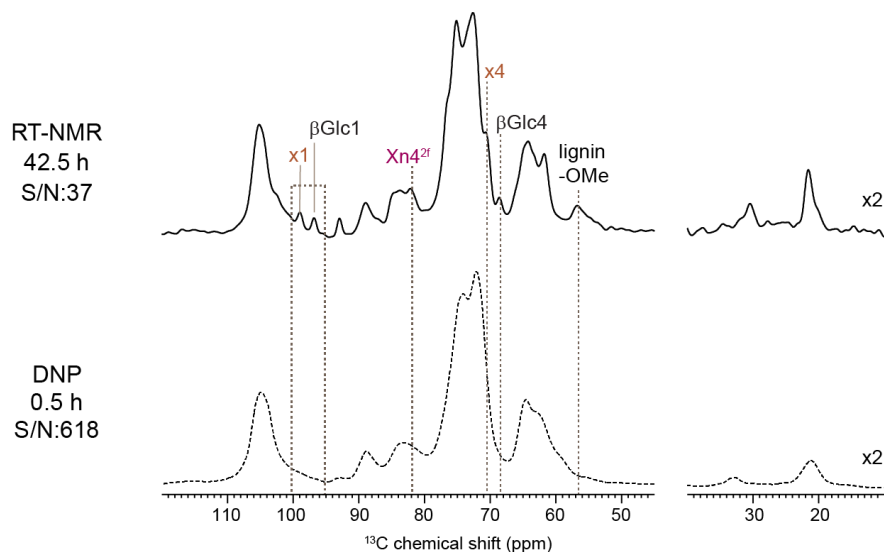

**Figure S3. Timesaving by DNP on carbohydrate signals in unlabeled rice stems.** Top row: The room-temperature spectrum collected on a 400 MHz NMR gives a signal-to-noise (S/N) ratio of 37 for the highest peak after 43 h of measurement. Bottom row: 600 MHz/395 GHz DNP provides a S/N ratio of 618 after only 0.5 h of measurement. Cellulose peaks are well reserved, but intensity suppression has been observed for xylan signals, lignin methyl ether (-OMe) and small molecules (Glc; glucose).

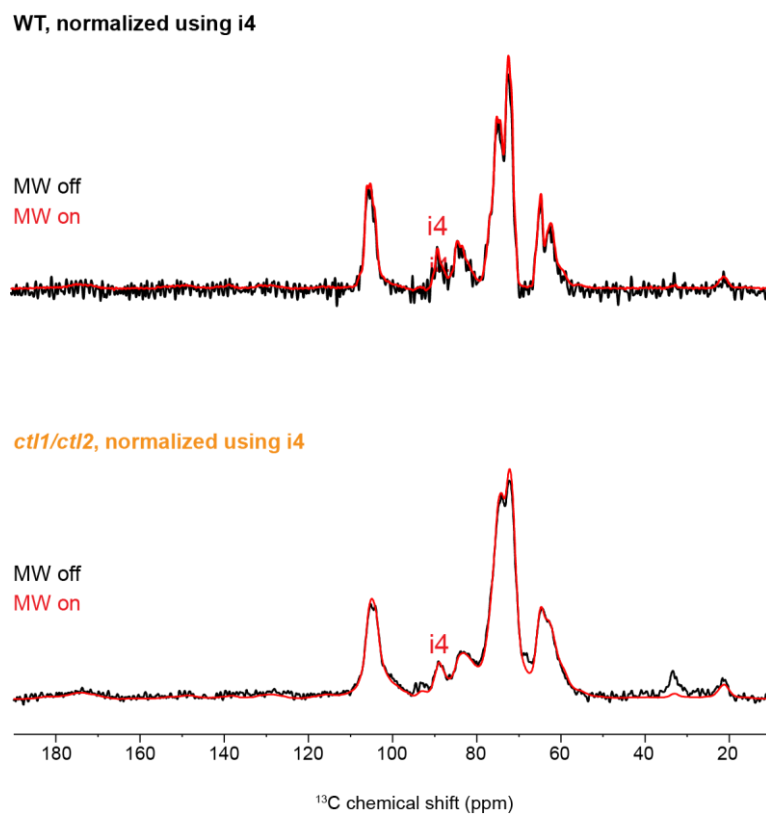

**Figure S4. DNP polarization is uniform across the cell wall.** The microwave-on (MW on) and microwave-off (MW off) spectra are normalized by the interior cellulose carbon 4 peaks (i4) to compare the spectral pattern. The consistent spectral envelope clearly demonstrate that the polarization is uniform across the whole cell wall.



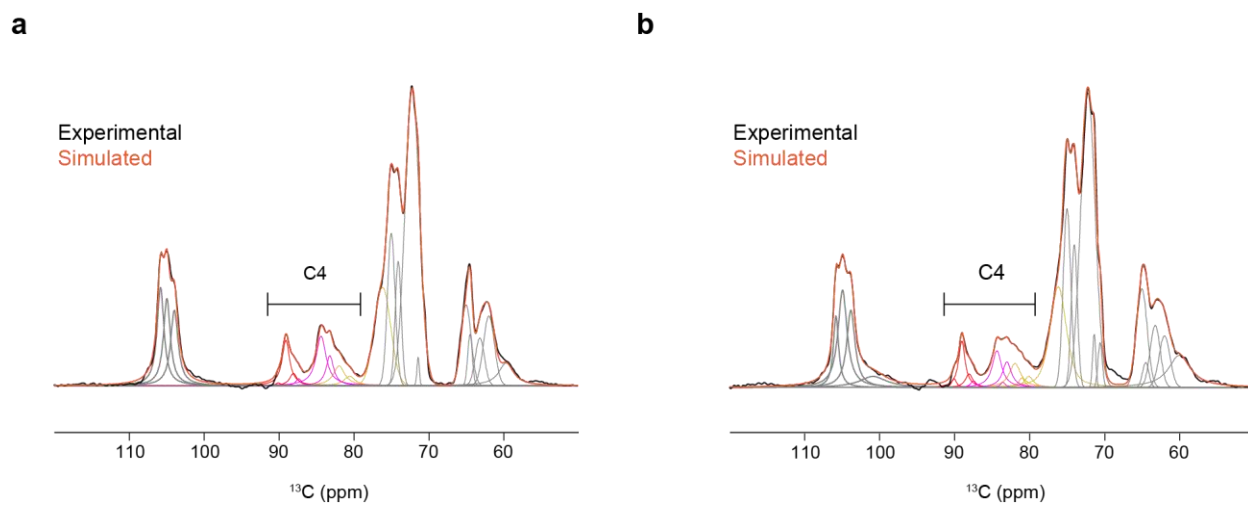

**Figure S5. The experimental and simulated spectra have a good match.** The 120 to 50 ppm regions of **a**, wild-type sample (left) and **b**, *ctI1 ctI2* double mutant (right) are shown. All numerical parameters used to obtain the fits are summarized in **Tables S1 and S2**. Color code follows peak classification in these tables: i4 cellulose in red, s4 in magenta, close peaks in dark yellow, and others in grey.

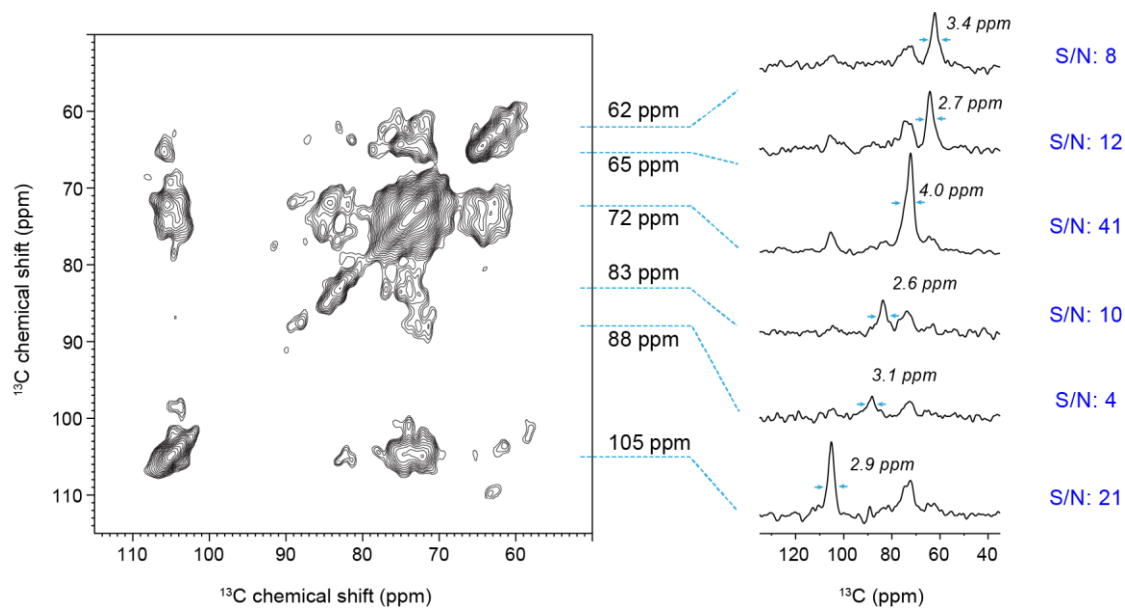

**Figure S6. 1D cross sections of DNP-enabled 2D CHHC spectrum.** Representative slices were extracted from the 2 ms CHHC spectrum of unlabeled wild-type rice stem. The  $^{13}\text{C}$  FWHM linewidths and signal-to-noise (S/N) ratios are shown for the major peaks.

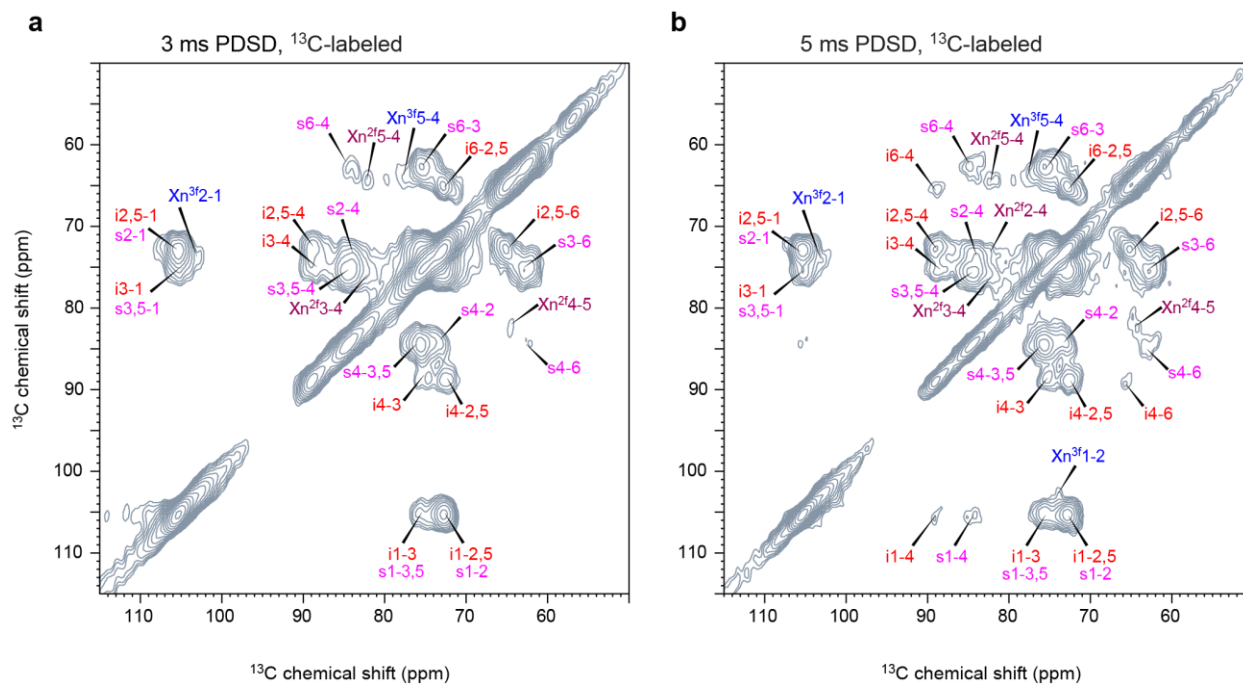

**Figure S7. 2D PDSD spectra of  $^{13}\text{C}$ -labeled rice stems.** The spectra are collected using **a**, 3 ms and **b**, 5 ms mixing times. Assignments of cellulose and xylan peaks are annotated on the spectra.

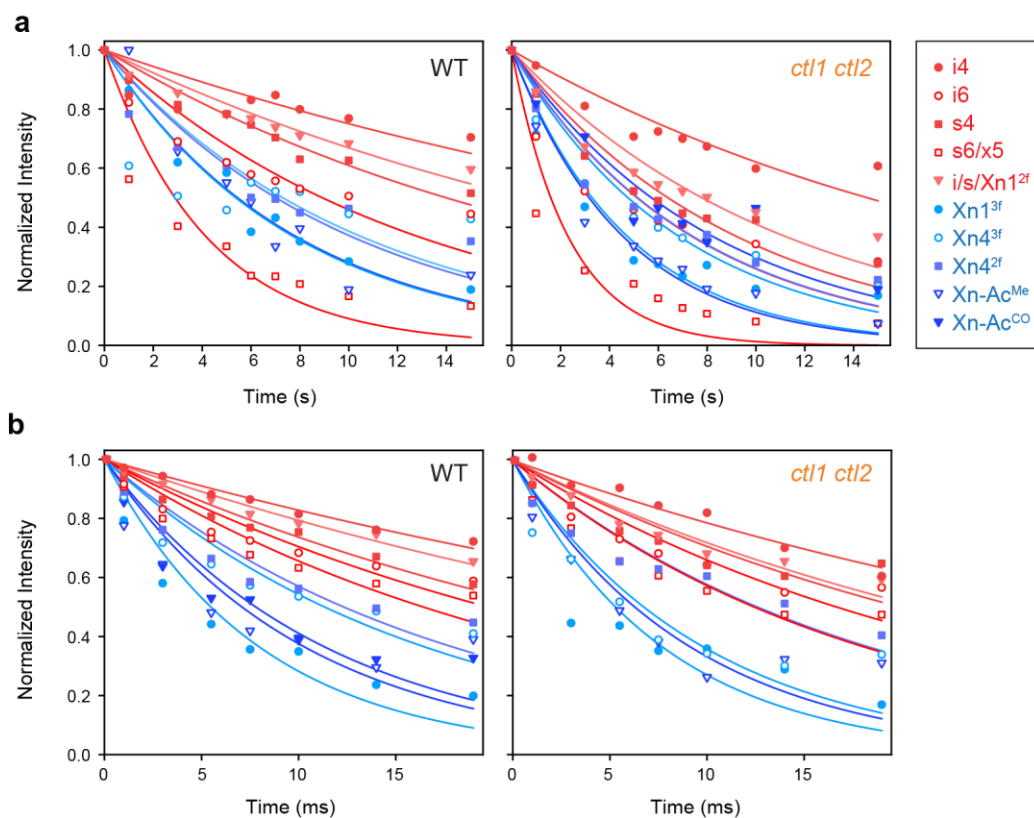

**Figure S8. NMR relaxation curves of polysaccharides in unlabeled rice stems.** The **a**,  $^{13}\text{C}$ - $T_1$  and **b**,  $^1\text{H}$ - $T_{1\rho}$  data are plotted separately for wild-type and *ct11 ct12* samples. Cellulose signals (red) generally exhibit faster relaxation than xylan peaks (blue). The exceptions in panel **a** only occur to the 62 ppm s6/x5 peak, which has mixed contribution from both cellulose and matrix polymers.
